# Supplementary material for: Physicians advice, parental practice and adherence to doctor’s advice: an original survey on infant feeding
Source: BMC Pediatr. 2019 Sep 4;19:313. doi: 10.1186/s12887-019-1697-y (PMC6724317; doi:10.1186/s12887-019-1697-y)
Supplement: Supplementary file 1 — Physician questionnaires including birth and current infant characteristics; parents’ allergy history; functional gastrointestinal disorders; infant feeding practices since birth and currently; dietary advice; time spent providing the advice. (PDF 181 kb) [file 12887_2019_1697_MOESM1_ESM.pdf]

**OPTINUTRI PRACTICE SURVEY**  
**«Nutritional advices and parental observance»**

E-survey “doctor” with conditional blocks

**Reference:** |\_|\_|\_|\_|

**Date of medical consultation:** |\_|\_|/|\_|\_|/|\_|\_|

**Birth information:**

Birth weight: |\_| kg |\_|\_|\_|

Length at birth: |\_|\_| cm

Sex: male ☐ female ☐

Birth term: I\_| I\_| weeks of amenorrhea

**Information during medical consultation:**

Age: |\_|\_|/|\_|\_|

Month/week

Weight: |\_|\_| kg |\_|\_|\_|

Length: |\_|\_| cm

**Parents allergic history:**

Father: Yes ☐ No ☐ do not know ☐

If so→: Cow's milk protein allergy ☐ other food allergies ☐ others ☐

Mother: Yes ☐ No ☐ do not know ☐

If so → Cow's milk protein allergy ☐ other food allergies ☐ others ☐

**Current infant feeding:**

- ☐ Exclusive breastfeeding
- ☐ Mixed breastfeeding
- ☐ Infant formula only
- ☐ Cow's milk
- ☐ Solid food

**Functional gastrointestinal disorders (FGID)**

Does the infant have intestinal functional disorders?

Yes ☐ No ☐

If so:

Evaluation of constipation:

Is the infant constipated? Yes ☐ No ☐

If so:

Number of stools per week: |\_\_|\_\_|

Are the last stools hard? Yes ☐ No ☐

Pain during bowel movement: Yes ☐ No ☐

Regular use of external maneuver: Yes ☐ No ☐

What advice and/or treatments did you give?

- Advice:

- ☐ Massage
- ☐ Change of mineral water
- ☐ Use of a water rich in magnesium

- Infant formula prescription (multiple choice):

- ☐ Acidified infant formula
- ☐ Infant formula with fibers
- ☐ Infant formula with prebiotics
- ☐ Infant formula with probiotics
- ☐ Lactose-enriched infant formula
- ☐ Others

(specify): .....

- Prescription of medication (multiple choice):

- ☐ Osmotic laxative
- ☐ Lubricant laxative
- ☐ Enema
- ☐ Suppository
- ☐

Others

(specify): .....

Evaluation of diarrhea:

Does the infant have diarrhea? Yes ☐ No ☐

If so

Does he have liquid stools? : Yes ☐ No ☐

If so:

- Number of liquid stools during the last 24 hours: |\_\_|\_\_|

- How many days have the stools been liquid? |\_\_|\_\_|

- Is the infant dehydrated? Yes ☐ No ☐

What treatments/infant formulas did you prescript?

☐ Prescription of medication:

☐ Oral Rehydration Solution (ORS)

☐

Others

(specify): .....

☐ Infant formula prescription:

☐ Usual infant formula (Drop-down list, with preselection of the last infant formula mentioned in the table of infant formula):

☐ Extensively hydrolyzed infant formula

☐ Anti-diarrhea infant formula

Evaluation of regurgitations:

Does the infant have regurgitations? Yes ☐ No ☐

If so

During the last 24 hours:

How many bottles did the infant consume?: 1\_\_1\_\_1

How many bottles have been followed by regurgitations?: 1\_\_1\_\_1

Evaluation of the importance of regurgitation on a scale of 0 (very low volume) to 10 (very large volume): 1\_\_1\_\_1 /10

Evaluation of the frequency of regurgitations on a scale of 0 (absence of regurgitations) to 10 (frequent regurgitations): Frequency: 1\_\_1\_\_1 /10

What advice and/or treatments did you give?

☐ Advice:

☐ Position of the infant during the meal

☐ Infant position during postprandial period

☐ To burp the baby

☐ Splitting or decreasing volume of meals

☐ Inclination of the bed

☐ Prohibition of passive smoking

☐ Infant formula prescription:

☐ Usual infant formula (Drop-down list, with preselection of the last infant formula mentioned in the table of infant formula): .....

☐ Thickened infant formula

☐ Anti-regurgitation infant formula "AR" with carob

☐ Anti-regurgitation infant formula "AR" with starch

☐ External thickener: carob

☐ External thickener: starch

☐ External thickeners: carob + starch

☐ External thickener: gellopectose

☐ Prescription of medication:

☐ Drug (drop-down list)

Evaluation of colics:

Does the infant fussing and crying periods impossible to settle down? Yes ☐ No ☐

If so:

Duration of crying  $\geq 3$  hours per day, 3 days per week, during at least one week? Yes ☐ / No ☐

What is the most common occurrence of crying (one answer only)?

Night (between 00AM and 8AM) ☐ Day (between 8AM and 4PM) ☐ Evening (between 4Pm and 11PM) ☐

What advice and/or treatments did you give? :

☐ Advice:

- ☐ In case of breastfeeding, the mother must avoid eating dried vegetables and cabbage
- ☐ Methodes of appeasement (massage, balancing...)
- ☐ Remove causes of aerophagia

☐ Infant formula prescription:

☐ Usual infant formula (Drop-down list, with preselection of the last infant formula mentioned in the table of infant formula): .....

- ☐ Lactose-free infant formula
- ☐ Infant formula with L.reuteri
- ☐ Acidified infant formula
- ☐ Hypoallergenic infant formula (partially hydrolyzed)
- ☐ Extensively hydrolyzed infant formula

☐ Prescription:

- ☐ Drug (drop-down list)
- ☐ An herbal infusion

|                       |
|-----------------------|
| <b>MEDICAL ADVICE</b> |
|-----------------------|

**Breastfeeding:**

During this medical consultation, did you give any advice/recommendations on breastfeeding for this infant?

Yes ☐ No ☐

→If so: you gave advice on (multiple choices):

- ☐ Benefits of breastfeeding on infant health?
- ☐ Feeding frequency?
- ☐ Duration of each feeding?
- ☐ Impact of mother's diet on breast milk?
- ☐ Impact of mother's lifestyle (cigarettes, alcohol, drugs...) on breast milk?
- ☐ Potential difficulties encountered?

.....  
Did you give advice to succeed intended weaning?

Yes ☐ No ☐

### **Infant formula**

Specify each infant formula given to this infant/child since birth including the current one (drop-down menu for each line with number choice – number one is the first given formula) and for which medical indication (drop-down list). Add as many lines as needed:

☐ None

→otherwise:

| Infant formula                                                                     | Medical indication                                          |
|------------------------------------------------------------------------------------|-------------------------------------------------------------|
| Drop-down list by stage: manufacturer choice, brand choice and then formula choice | Drop-down medical indication list (principal and secondary) |
|                                                                                    |                                                             |
|                                                                                    |                                                             |
|                                                                                    |                                                             |

→if at least one infant formula given:

Did you give any advice other than in the case of a functional gastrointestinal disorder?

Yes ☐ No ☐

→If so:

Did you give advice on (multiple choice):

☐ Feeding frequency?

☐ How much milk per day?

☐ How much milk per bottle?

To calculate the amount of milk to advise:

Did you use the Appert's formula in relation to the weight

Yes ☐ No ☐

Did you follow the indicated instructions on infant formula packaging?

Yes ☐ No ☐

Did you give any advice on the type of infant formula to use ?

Yes ☐ No ☐

→if so:

☐ Formula designed for breastfeeding relay

☐ Standard formula

☐ Hypoallergenic formula (HA)

☐ Follow on formula

☐ Young child formula

☐ In case of functional gastrointestinal disorders (FGID), have you advised:

- ☐ Thickened formula
- ☐ Anti-regurgitation formula
- ☐ Anti-colic formula
- ☐ Anti-diarrhea formula
- ☐ Formula designed for constipation
- ☐ Minor and combined gastrointestinal disorders

☐ Extensively hydrolyzed formula

### **Solid foods**

At this medical consultation, did you give any advice regarding the introduction of solid foods for this infant?

Yes ☐ No ☐

→If so:

If so, did you give advice on:

- The appropriate age for introduction of solid foods?

Yes ☐ No ☐

→If so:

- ☐ Before 4 months?
- ☐ Between 4 and 5 months?
- ☐ Between 5 and 6 months?
- ☐ Between 4 and 6 months?
- ☐ After 6 months?

- Introduction of gluten?

Yes ☐ No ☐

→If so:

Did you recommend an appropriate age for introduction of gluten?

Yes ☐ No ☐

→If so:

- ☐ Before 4 months
- ☐ Between 4 and 6 months
- ☐ Between 4 and 7 months
- ☐ After 6 months

Did you explain how to do it?

Yes ☐ No ☐

→If so:

- ☐ By adding infant cereals in infant formula
- ☐ By adding infant cereals in purees
- ☐ By using biscuits, bread
- ☐ By using mixed pasta

☐ Others (specify): .....

Did you specify how much of these foods to introduce at the beginning?

Yes ☐ No ☐

- Did you specify which food to introduce first?

Yes ☐ No ☐

→If so (multiple choice):

- ☐ Mashed cooked vegetable
- ☐ Mashed cooked fruits
- ☐ Infant cereals
- ☐ Starchy foods (pasta, rice, potatoes)
- ☐ Meat
- ☐ Fish
- ☐ Others (specify): .....

Did you recommend any order of introduction of the different food categories?

Yes ☐ No ☐

→If so:

- ☐ Vegetables first
- ☐ Fruits first
- ☐ Vegetables or fruits first?
- ☐ Starchy foods first (pasta, rice, potatoes)
- ☐ Infant cereals first?
- ☐ Meat first?
- ☐ Others (specify): .....

Did you specify if it is better to introduce first the solid foods in the bottle or with a spoon?

Yes ☐ No ☐

→If so:

- ☐ in bottle?
- ☐ with spoon?
- ☐ No matter

Did you give advice on the texture to give to the baby?

Yes ☐ No ☐

→If so: (multiple choice):

- ☐ Mixed
- ☐ Smooth
- ☐ Mashed
- ☐ Grainy
- ☐ Small soft pieces
- ☐ Small hard pieces
- ☐ Others (specify)

Did you recommend quantities of each type of food categories to consume?

Yes ☐ No ☐

→ If so: (multiple choice):

- ☐ For vegetables?
- ☐ For fruits?
- ☐ For starchy foods?
- ☐ For infant cereals?
- ☐ For meat or fish?

Did you recommend food quantities in grams to the parents?

Yes ☐ No ☐

Did you recommend spoonful or household measures to the parents?

Yes ☐ No ☐

Have you recommended to parents a change in quantities with age?

Yes ☐ No ☐

If the infant is not at risk of allergy, have you recommended introducing solid foods one by one?

Yes ☐ No ☐

→ If so, how often?

- ☐ One or more per day
- ☐ One every 2 days
- ☐ One every 3 days
- ☐ One per week
- ☐ Others (specify): .....

Did you recommend delaying the introduction of certain foods?

Yes ☐ No ☐

If so, which ones:

.....

If the infant is at risk of allergy, have you recommended introducing solid foods

Yes ☐ No ☐

→ if so, how often?

- ☐ One or more per day
- ☐ One every 2 days
- ☐ One every 3 days
- ☐ One per week
- ☐ Other

Did you recommend delaying the introduction of certain foods?

Yes ☐ No ☐

→ if so, which ones

.....

Did you give list of foods to proscribe?

Yes ☐ No ☐

Did you give any advice on using homemade foods or specific baby foods?

Yes ☐ No ☐

→If so:

- ☐ Preferably Homemade
- ☐ Preferably specific baby foods
- ☐ Both without distinction

Did you give any advice on preparing homemade purees?

Yes ☐ No ☐

If so, on:

- ☐ Adding salt
- ☐ Adding sugar
- ☐ Adding fats
- ☐ The quality of fruits and vegetables
- ☐ The strict washing of fruits and vegetables
- ☐ Cooking methods

Did you recommend:

- ☐ To vary the vegetables and fruits?
- ☐ Sharing meals with family?

If the baby refuses certain foods, did you give advices?

Yes ☐ No ☐

If so:

- ☐ Do not force
- ☐ Do not give in to the child
- ☐ Propose something else equivalent
- ☐ Propose something else
- ☐ Re-propose later
- ☐ Re-propose later several times until he appreciates it

|                                |
|--------------------------------|
| <b>TIME DEVOTING ON ADVICE</b> |
|--------------------------------|

How much time was spent on food advices/recommendations/prescriptions during the medical consultation?

- ☐ No advice
- ☐ Between 0 and 3min
- ☐ Between 3 and 5min
- ☐ Between 5 and 10min
- ☐ Between 10 and 15min
- ☐ More than 15min

Do you consider this time sufficient?

Yes ☐ No ☐

If not: What would be the ideal time to devote on medical consultation to this subject? I \_\_ I \_\_ I minutes

|                             |
|-----------------------------|
| <b>NEED FOR INFORMATION</b> |
|-----------------------------|

What are the topics about infant nutrition that you would like to know more about? :

.....

Which types of media help you more specifically in your daily practice? (Multiple choices)

- ☐ Website?  
→if checked, which one? .....
- ☐ Smartphone application?  
→ if checked, which one? .....
- ☐ Newsletter
- ☐ Paper newsletter
